# Supplementary material for: Room temperature ferroelectric copper(ii) coordination polymers based on amino acid hydrazide ligands
Source: Royal Society of Chemistry journal article supplement (doi:10.1039/d1nj05746d), 2022-01-01
Supplement: d1nj05746d1.pdf [file d1nj05746d1.pdf]

## Electronic supplementary information

for

### Room temperature ferroelectric copper(II) coordination polymers based on amino acid hydrazide ligands

Andreas Puškarić<sup>1</sup>, Marko Dunatov<sup>1</sup>, Ivanka Jerić<sup>1</sup>, Igor Sabljic,<sup>1,2</sup> and Lidija Androš Dubraja<sup>1,\*</sup>

<sup>1</sup>Ruđer Bošković Institute, Bijenička cesta 54, 10000 Zagreb, Croatia

<sup>2</sup>Department of Molecular Sciences, Swedish University of Agricultural Sciences, Uppsala, SE-75651,  
Sweden

Email: [Lidija.Andros@irb.hr](mailto:Lidija.Andros@irb.hr)

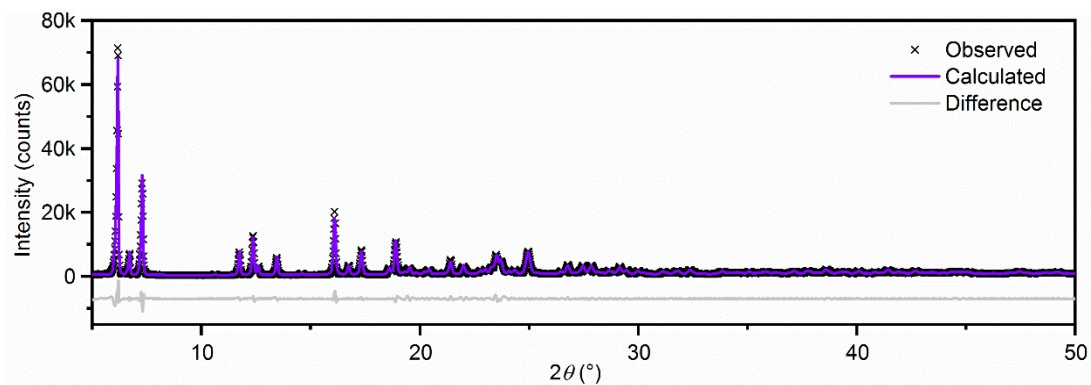

**Figure S1.** Room temperature XRD pattern and profile fitting results for  $\{\text{Cu}_3(\text{L2})_2(\text{TPA})\}_n \times \text{solvent}$  (**2**).

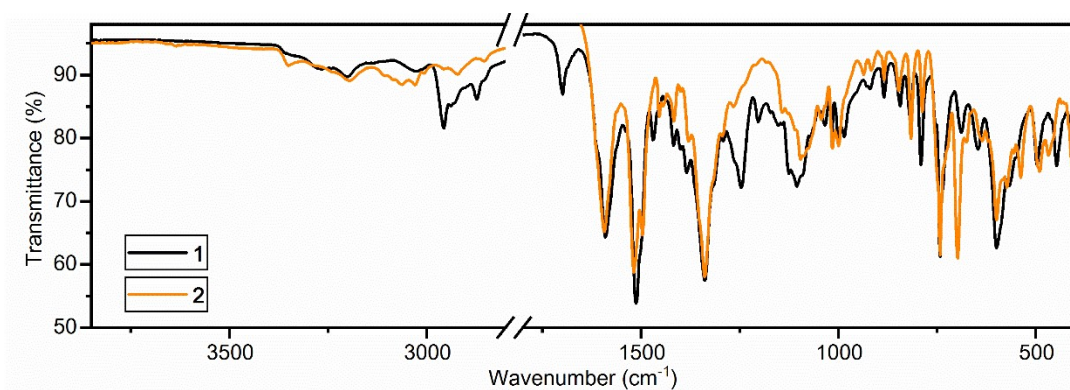

**Figure S2.** ATR spectra of coordination polymers  $\{\text{Cu}_3(\text{L1})_2(\text{TPA})\}_n \times \text{solvent}$  (**1**) and  $\{\text{Cu}_3(\text{L2})_2(\text{TPA})\}_n \times \text{solvent}$  (**2**)

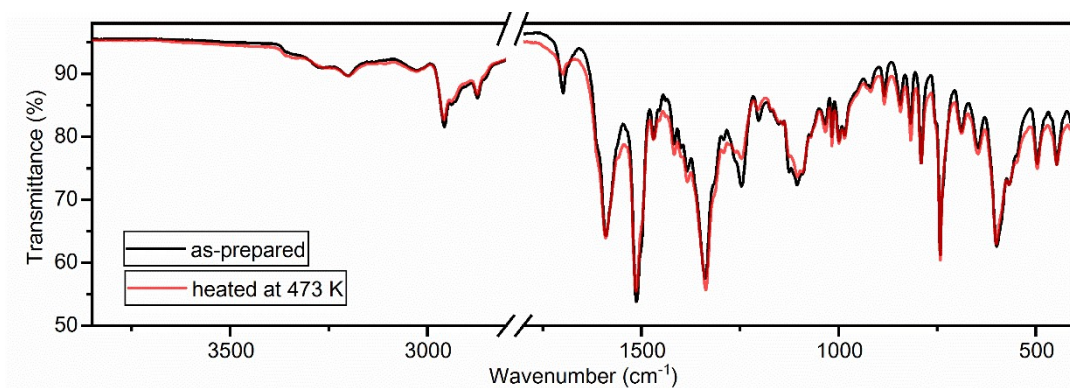

**Figure S3.** ATR spectra of coordination polymer  $\{\text{Cu}_3(\text{L1})_2(\text{TPA})\}_n \times \text{solvent}$  (**1**) as-prepared and heated at 473 K.

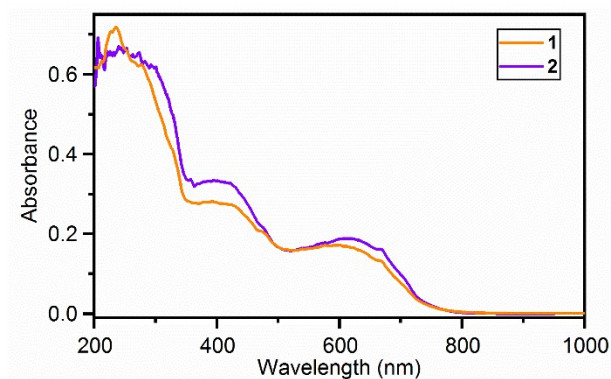

**Figure S4.** Solid state UV-visible diffuse reflectance spectrum of the  $\{\text{Cu}_3(\text{L1})_2(\text{TPA})\}_n \times \text{solvent}$  (**1**) and  $\{\text{Cu}_3(\text{L2})_2(\text{TPA})\}_n \times \text{solvent}$  (**2**)

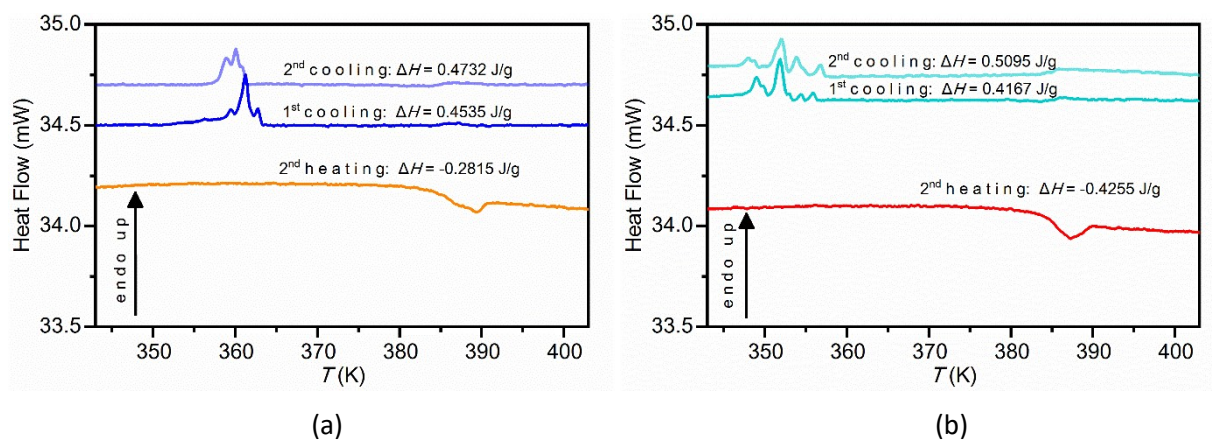

**Figure S5.** DSC curves for heating and cooling cycles for compounds **1** (a) and **2** (b).

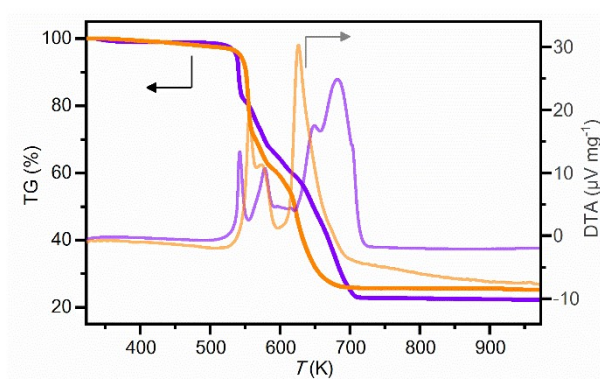

**Figure S6.** TG and DTA curves for compound **1** and **2** (orange and violet respectively) measured under a synthetic air atmosphere.

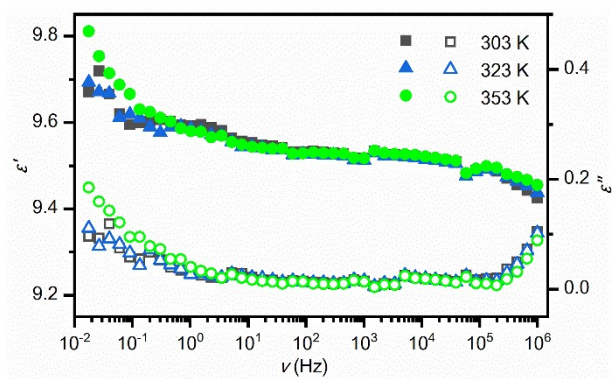

**Figure S7.** Frequency dependence of the real (closed symbols) and imaginary (open symbols) parts of the complex dielectric constant measured at different temperatures for compound **1**.

**Table S1.** Bond lengths (Å) involved in the first coordination sphere of copper(II) atoms in  $\{\text{Cu}_3(\text{L1})_2(\text{TPA})\}_n \times \text{solvent}$  (**1**).

|        |           |        |           |        |           |
|--------|-----------|--------|-----------|--------|-----------|
| Cu1–N1 | 2.030(13) | Cu2–N2 | 1.865(15) | Cu3–N6 | 1.940(16) |
| Cu1–N4 | 2.003(14) | Cu2–N3 | 1.940(14) | Cu3–N7 | 2.037(14) |
| Cu1–N5 | 1.945(17) | Cu2–O1 | 1.950(10) | Cu3–O4 | 2.002(12) |
| Cu1–N8 | 1.943(15) | Cu2–O5 | 1.924(11) | Cu3–O7 | 1.874(15) |

**Table S2.** Selected angles (°) in the coordination spheres of copper(II) atoms in  $\{\text{Cu}_3(\text{L1})_2(\text{TPA})\}_n \times \text{solvent}$  (**1**).

|           |           |            |           |            |           |
|-----------|-----------|------------|-----------|------------|-----------|
| N1–Cu1–N4 | 79.4(6)   | N2–Cu2–N3  | 82.6(7)   | N6–Cu3–N7  | 85.8(7)   |
| N1–Cu1–N5 | 178.6(5)  | N2–Cu2–O1  | 82.1(5)   | N6–Cu3–O4  | 79.5(6)   |
| N1–Cu1–N8 | 97.5(6)   | N2–Cu2–O5  | 171.9(5)  | N6–Cu3–O7  | 170.2(6)  |
| N4–Cu1–N5 | 99.5(6)   | N3–Cu2–O1  | 163.4(6)  | N7–Cu3–O4  | 162.1(5)  |
| N4–Cu1–N8 | 176.3(6)  | N3–Cu2–O5  | 104.9(6)  | N7–Cu3–O7  | 103.5(6)  |
| N5–Cu1–N8 | 83.5(6)   | O1–Cu2–O5  | 90.8(5)   | O4–Cu3–O7  | 92.0(5)   |
| Cu2–O1–C1 | 110.4(11) | Cu3–O4–C13 | 111.0(10) | C25–O5–Cu2 | 128.1(10) |

**Table S3.** Hydrogen-bonding geometry in  $\{\text{Cu}_3(\text{L1})_2(\text{TPA})\}_n \times \text{solvent}$  (**1**).

| $D-H \cdots A$          | $D-H/\text{Å}$ | $H \cdots A/\text{Å}$ | $D \cdots A/\text{Å}$ | $D-H \cdots A/^\circ$ | Symm. op. on A   |
|-------------------------|----------------|-----------------------|-----------------------|-----------------------|------------------|
| N3–H3C $\cdots$ O2      | 0.89           | 2.14                  | 2.90(2)               | 142                   | 1 + x, y, z      |
| N7–H7B $\cdots$ O3      | 0.89           | 2.14                  | 2.92(2)               | 146                   | -1 + x, y, z     |
| N3–H3D $\cdots$ solvent | 0.89           |                       |                       |                       |                  |
| N7–H7A $\cdots$ solvent | 0.89           |                       |                       |                       |                  |
| N3–H3C $\cdots$ O6      | 0.89           | 2.51                  | 2.88(2)               | 105                   | 3 + x, -1 + y, z |
| C3–H3A $\cdots$ O1      | 0.97           | 2.57                  | 2.914(19)             | 101                   |                  |
| C15–H15A $\cdots$ O4    | 0.97           | 2.52                  | 2.87(2)               | 101                   |                  |
| C21–H21A $\cdots$ O3    | 0.97           | 2.56                  | 3.24(2)               | 127                   | -1 + x, y, z     |
| C28–H28 $\cdots$ O7     | 0.93           | 2.49                  | 2.80(2)               | 100                   |                  |
| C30–H30 $\cdots$ O8     | 0.93           | 2.44                  | 2.75(2)               | 100                   |                  |
